# Supplementary material for: Tuning excited state energy levels by achieving coordination-induced thermally activated delayed fluorescence
Source: Royal Society of Chemistry journal article supplement (doi:10.1039/d2qi01779b), 2022-01-01
Supplement: d2qi01779b1.pdf [file d2qi01779b1.pdf]

## Supporting Information

### **Tuning Excited States Energy Levels through Achieving Coordination Induced Thermally Activated Delayed Fluorescence**

*Dong Liang, Ji-Hui Jia, Xian-Bao Cai, Yu-Qing Zhao, Zhan-Qi Wang, Can-Zhong Lu\**

## Contents

1. Materials and Instruments
2. Synthesis of Materials
3. NMR Spectra
4. Thermogravimetric Analysis
5. Electrochemical measurements.
6. X-ray Crystallographic Analysis
7. Computational Methodology and Results
8. Photophysical Properties
9. Equations
10. Reference

## 1. Materials and Instruments

$^1\text{H}$  NMR and  $^{13}\text{C}$  NMR spectra were recorded on a Bruker Avance III 400 MHz NMR spectrometer and a JEOL ECZ400S 400 MHz NMR spectrometer for  $\text{CD}_2\text{Cl}_2$ . Chemical shifts were given in ppm referenced to tetramethylsilane (TMS,  $\delta = 0$  ppm). Peak multiplicities were reported with the notation s (singlet), d (double), t (triplet), q (quartet), and m (multiplet). Elemental analyses (C, H, C) were implemented with an Elementary Vario EL III elemental analyzer. Thermogravimetric analyses (TGA) of samples were performed on METTLER TOLEDO TGA/DSC 1 STARe System with a heating rate of  $10^\circ\text{C}/\text{min}$  under nitrogen. At a scan rate of  $5^\circ \text{min}^{-1}$  (scan range:  $5^\circ - 60^\circ$ ). All UV-visible absorption spectra were determined on a PerkinElmer Lambda 650 spectrophotometer under ambient conditions. Steady-state photoluminescence spectra at 298 K were measured using Edinburgh Analytical instrument FLS980. Photoluminescence spectra at 77K and time-resolved photoluminescent decay experiments (lifetime) were performed on an Edinburgh Analytical instrument LP980 equipped with OPO laser and FLS980 equipped with both xenon arc lamp (450 W) and pulsed flash lamps. Delayed emission spectra in solution recorded by Edinburgh Analytical instrument FLS980 equipped with EPL-375 laser. The variable-temperature measurements were carried out on corresponding instruments by using an additional LINKAM THMS600 system. 10wt% doped PMMA films were fabricated by spin-coating DCM solution with concentration of 20mg/ml.

## 2. Synthesis of Materials

Synthesis of Complexes **1** and **2**. A mixture of  $[\text{Ag}(\text{CH}_3\text{CN})_4]\text{BF}_4$  and corresponding phosphine ligand (1 mmol POP or Xantphos) in  $\text{CH}_2\text{Cl}_2$  (5 mL) was stirred for 20 min at room temperature, and then spiro-2N (1 mmol) was added. After the mixture was stirred for another 2 hours, the solvent was removed by evaporation. Single crystals of these two complexes suitable for X-ray diffraction measurements were obtained by diffusion of ether into  $\text{CH}_2\text{Cl}_2$  solution.

$[\text{Ag}(\text{spiro-2N})(\text{POP})]\text{BF}_4$  (**1**).  $^1\text{H}$  NMR (400 MHz, Methylene Chloride- $d_2$ )  $\delta$  8.58 (d,  $J = 18.9$  Hz, 2H), 7.96 (d,  $J = 8.9$  Hz, 2H), 7.75 (t,  $J = 7.7$  Hz, 2H), 7.63 (t,  $J = 7.7$  Hz, 1H), 7.52 – 7.45 (m, 4H), 7.43 – 7.35 (m, 4H), 7.30 (p,  $J = 8.0, 7.3$  Hz, 18H), 7.02 (d,  $J = 7.0$  Hz, 3H), 6.93 (t,  $J = 7.6$  Hz, 1H), 6.85 (d,  $J = 3.8$  Hz, 4H), 6.62 – 6.56 (m, 2H), 6.43 (d,  $J = 8.5$  Hz, 2H), 6.18 (d,  $J = 13.1$  Hz, 2H).  $^{13}\text{C}$  NMR (101 MHz, Methylene Chloride- $d_2$ )  $\delta$  157.52, 142.17, 140.68, 134.67, 134.29, 134.19, 132.61, 131.87, 131.29, 131.14, 130.54, 129.60, 129.56, 129.51, 129.12, 127.22, 127.08, 125.27, 123.93, 121.48, 119.25, 116.12.

$[\text{Ag}(\text{spiro-2N})(\text{XANT})]\text{BF}_4$  (**2**).  $^1\text{H}$  NMR (400 MHz, Methylene Chloride- $d_2$ )  $\delta$  8.53 (d,  $J = 4.9$  Hz, 2H), 7.99 (d,  $J = 7.7$  Hz, 2H), 7.76 (t,  $J = 8.0$  Hz, 2H), 7.69 (d,  $J = 7.8$  Hz, 2H), 7.67 – 7.60 (m, 1H), 7.50 (dd,  $J = 12.6, 6.0$  Hz, 4H), 7.39 – 7.31 (m, 4H), 7.29 – 7.13 (m, 18H), 7.03 (t,  $J = 7.8$  Hz, 2H), 6.68 (dt,  $J = 6.3, 4.0$  Hz, 2H), 6.61 (t,  $J = 7.5$  Hz, 2H), 6.45 (d,  $J = 8.4$  Hz, 2H), 6.20 (d,  $J = 7.8$  Hz, 2H), 1.89 (s, 6H).  $^{13}\text{C}$  NMR (101 MHz, Methylene Chloride- $d_2$ )  $\delta$  151.15, 149.44, 141.65, 140.17, 135.55, 133.42, 133.33, 133.24, 132.60, 131.83, 131.32, 130.74, 130.39, 129.82, 128.98, 128.95, 128.90, 128.85, 128.55, 128.01, 126.58, 126.51, 124.78, 120.97, 119.99, 115.60, 35.29, 29.51.

### 3. NMR Spectra

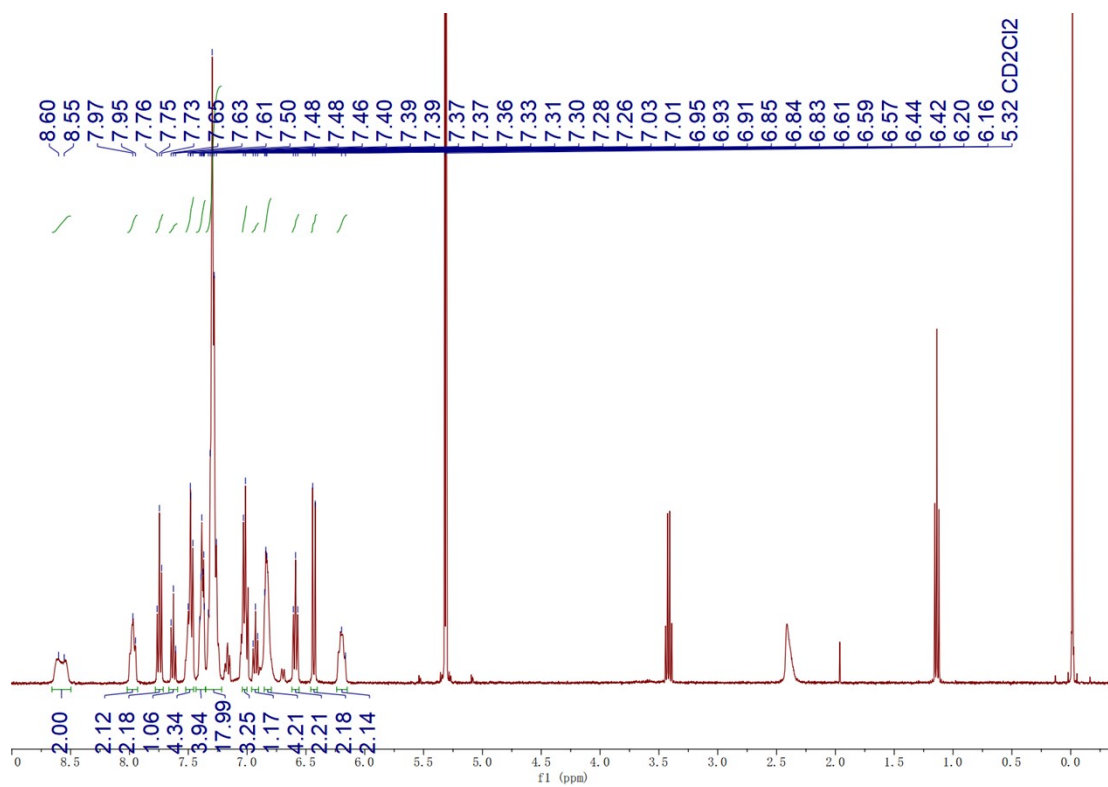

Fig. S1. <sup>1</sup>H NMR spectrum of **1**.

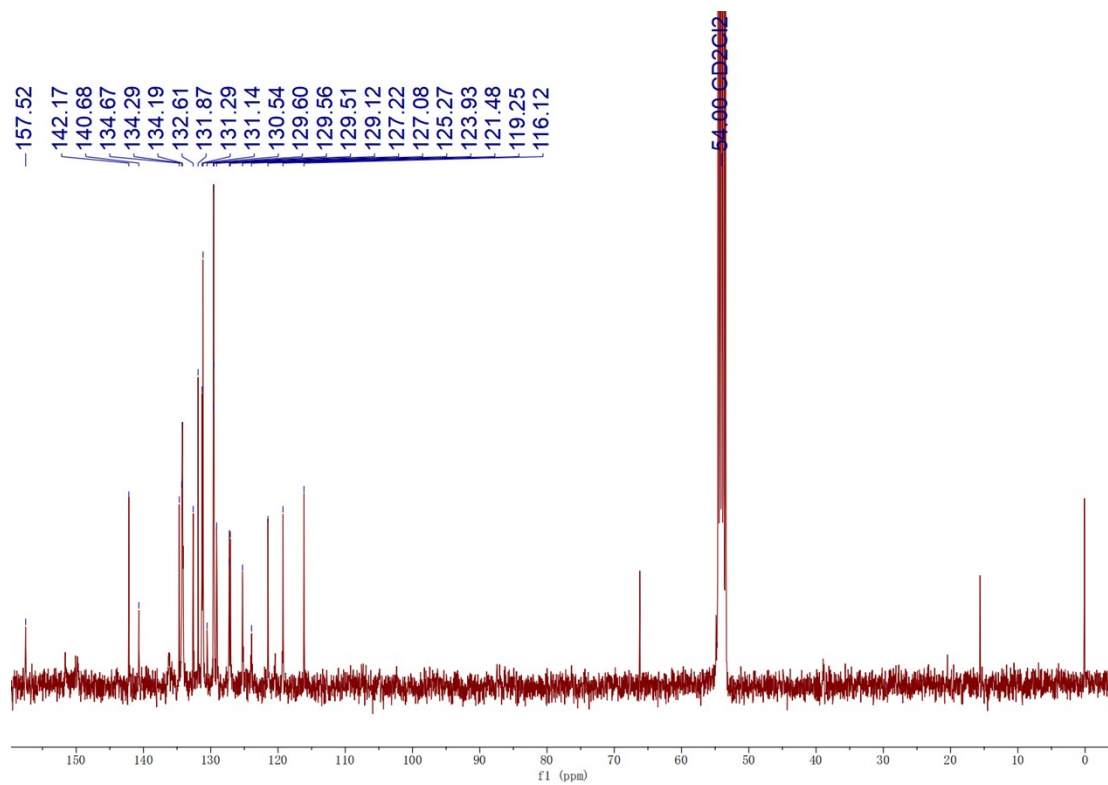

Fig. S2. <sup>13</sup>C NMR spectrum of **1**.

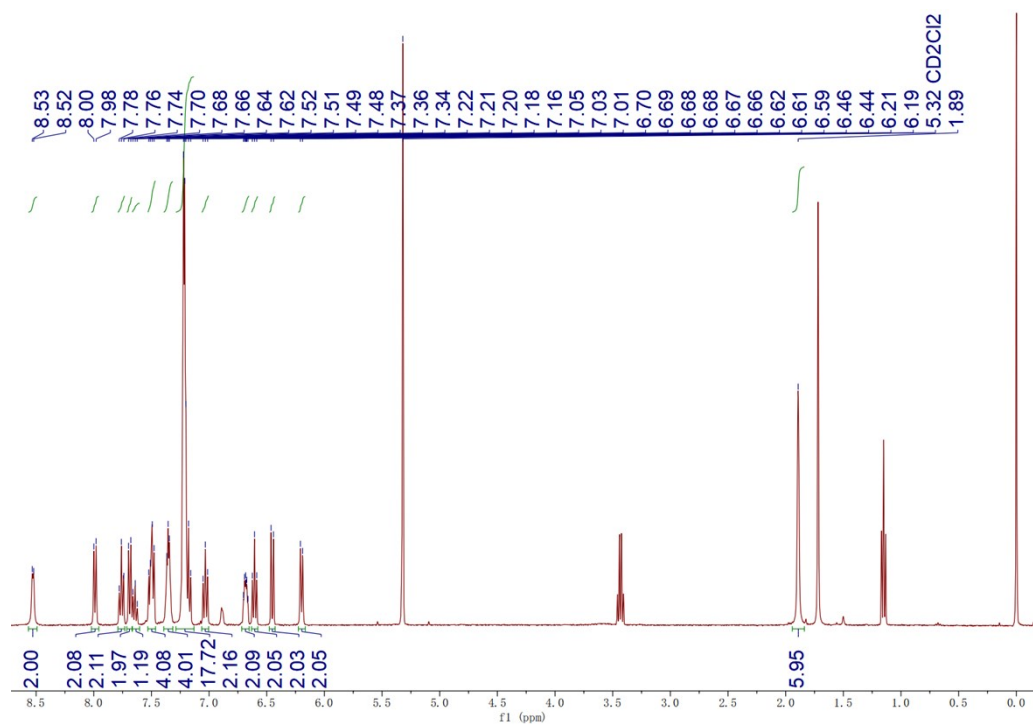

Fig. S3. <sup>1</sup>H NMR spectrum of **2**.

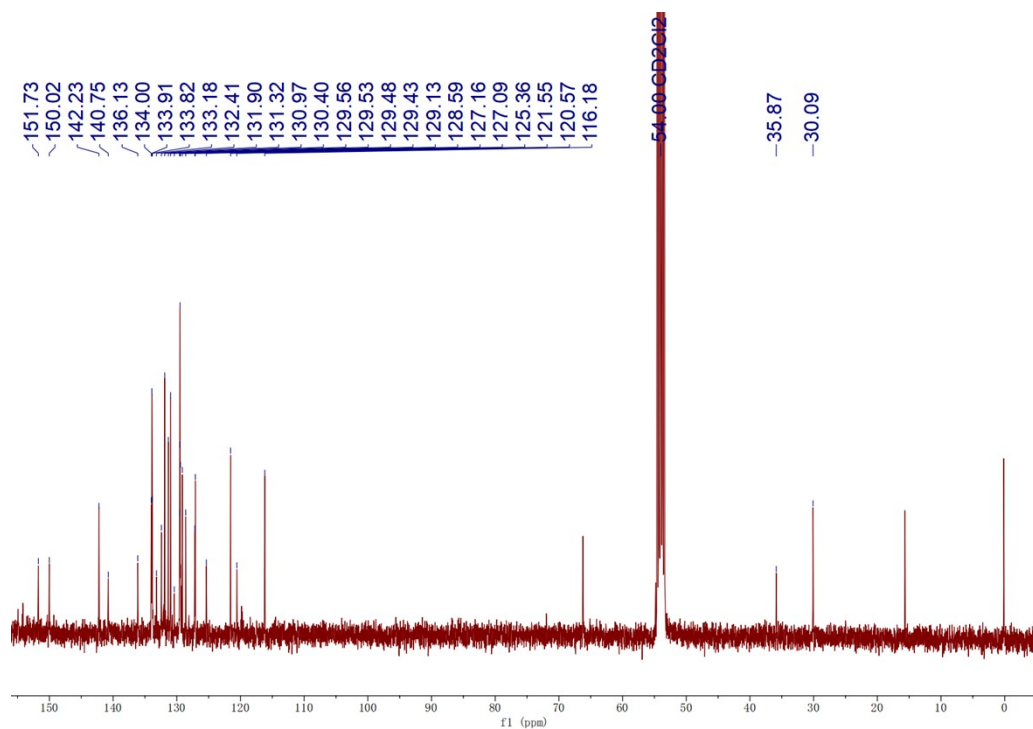

Fig. S4. <sup>13</sup>C NMR spectrum of **2**.

#### 4. Thermogravimetric Analysis

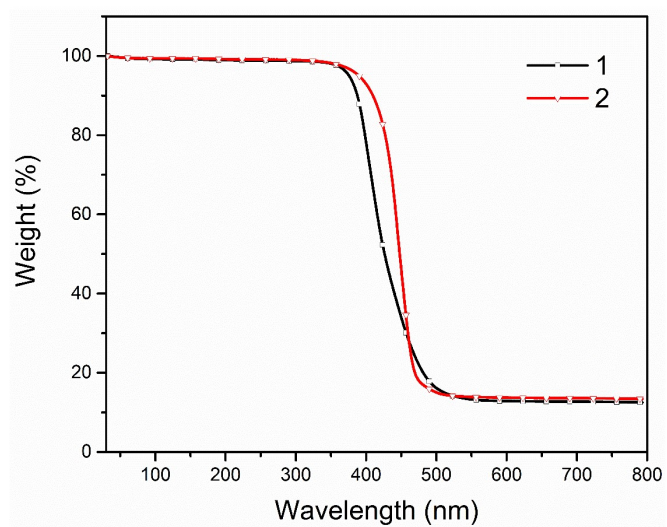

Fig. S5. TGA curves of **1** and **2**.

## 5. Electrochemical measurements.

Cyclic voltammetry was performed in a gastight single-compartment three-electrode cell with a CHI604E Voltammetric Analyzer at room temperature. A glassy carbon disk and a platinum wire were selected as the working and auxiliary electrodes, respectively. The reference electrode was Ag/Ag<sup>+</sup> (0.01 M of AgNO<sub>3</sub> in acetonitrile). The CV measurements were carried out in anhydrous and nitrogen-saturated acetonitrile solutions with 0.1 M n-tetrabutylammonium hexafluorophosphate and 2.0 mM investigated compounds. The ferrocenium/ferrocene couple was used as an internal standard.

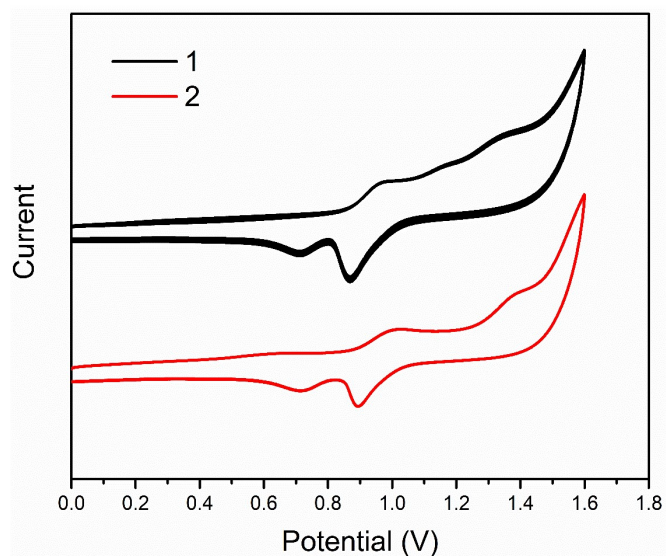

Fig. S6. Cyclic voltammogram of compound **1** and **2** in degassed Dichloromethane.





---

|                            |        |        |
|----------------------------|--------|--------|
| wR <sub>2</sub> [I>=2σ(I)] | 0.2869 | 0.1830 |
|----------------------------|--------|--------|

---

**Table S2.** Selected bond distances (Å) and angles (°) of complexes **1** and **2**.

---

| Compound     |            | <b>1</b>   | <b>2</b>   |
|--------------|------------|------------|------------|
| Distances(Å) | Ag1-N1     | 2.283(5)   | 2.333(3)   |
|              | Ag1-P1     | 2.5046(18) | 2.4346(10) |
|              | Ag1-P2     | 2.4237(17) | 2.4827(11) |
|              | Ag1-N2     | 2.8056(51) | 2.6761(35) |
| Angles(°)    | P1-Ag1-P2  | 112.63(6)  | 117.67(4)  |
|              | P2-Ag1- N1 | 139.22(15) | 106.21(9)  |
|              | N1-Ag1-P1  | 106.56(14) | 133.88(9)  |

---

## 7. Computational Methodology and Results

The distribution of frontier molecule orbitals and excited states were obtained from the Gaussian 09 program [2]. The density functional theory (DFT) and time-dependent (TD-DFT) density functional theory calculations were performed at PBE0 level using 6-31g\*/LANL2DZ basis sets in conjunction with the polarizable continuum model (PCM) using dichloromethane as the solvent. The structures in the singlet ground ( $S_0$ ) state were optimized via DFT. The  $S_1$  and  $T_1$  geometries were optimized via TDDFT. The input coordinates were extracted from the X-ray crystallographic data. Charge density differences (CDD) upon the  $S_0 \rightarrow S_1$  and  $S_0 \rightarrow T_n$  transitions were carried out using Multiwfn 3.7 program [3]. The computational results of compound spiro-2N reference to the literature [1].

**Table S3.** The singlet ( $S_1$ ) and triplet ( $T_n$ ) states transition configurations of **1** calculated by TD-DFT based on optimized  $S_0$  geometry.

|       | Orbs | Energy (eV) | Transition Configuration                                                                                                                                                                                                    |
|-------|------|-------------|-----------------------------------------------------------------------------------------------------------------------------------------------------------------------------------------------------------------------------|
| $S_n$ | 1    | 2.8531      | H→L(99.38%)                                                                                                                                                                                                                 |
| $T_n$ | 1    | 2.8432      | H→L(98.76%)                                                                                                                                                                                                                 |
|       | 2    | 3.0211      | H-2→L(46.04%), H-2→L+1(15.19%), H-13→L(12.36%), H-16→L(10.33%), H-25→L+21(2.65%), H-23→L(2.63%), H-22→L+3(2.26%), H-13→L+1(1.83%), H-23→L+1(1.30%), H-16→L+1(1.10%)                                                         |
|       | 3    | 3.1005      | H→L+3(34.59%), H→L+16(15.55%), H→L+17(8.53%), H→L+11(7.39%), H-2→L+9(4.74%), H-5→L+19(4.46%), H-6→L+23(3.19%), H→L+15(2.32%), H→L+21(2.23%), H→L+1(2.12%), H-13→L+23(2.08%), H-5→L+11(2.01%), H→L+4(1.95%), H-16→L+9(1.91%) |

**Table S4.** The singlet ( $S_1$ ) and triplet ( $T_n$ ) states transition configurations of **2** calculated by TD-DFT based on optimized  $S_0$  geometry.

|       | Orbs | Energy (eV) | Transition Configuration                                                                                                                                                                       |
|-------|------|-------------|------------------------------------------------------------------------------------------------------------------------------------------------------------------------------------------------|
| $S_n$ | 1    | 2.8514      | H→L(99.35%)                                                                                                                                                                                    |
| $T_n$ | 1    | 2.8384      | H→L(98.36%)                                                                                                                                                                                    |
|       | 2    | 3.0211      | H-3→L(45.68%), H-3→L+1(15.30%), H-12→L(13.67%), H-17→L(9.81%), H-23→L(2.82%), H-25→L+21(2.74%), H-22→L+3(2.41%), H-12→L+1(2.04%), H-23→L+1(1.32%), H-17→L+1(1.09%)                             |
|       | 3    | 3.0999      | H→L+3(32.77%), H→L+15(24.46%), H→L+1(7.05%), H→L+11(6.95%), H-3→L+9(5.15%), H-5→L+19(4.29%), H-7→L+23(3.01%), H→L+21(2.27%), H-17→L+9(2.08%), H-12→L+23(2.03%), H-5→L+11(1.75%), H→L+14(1.44%) |

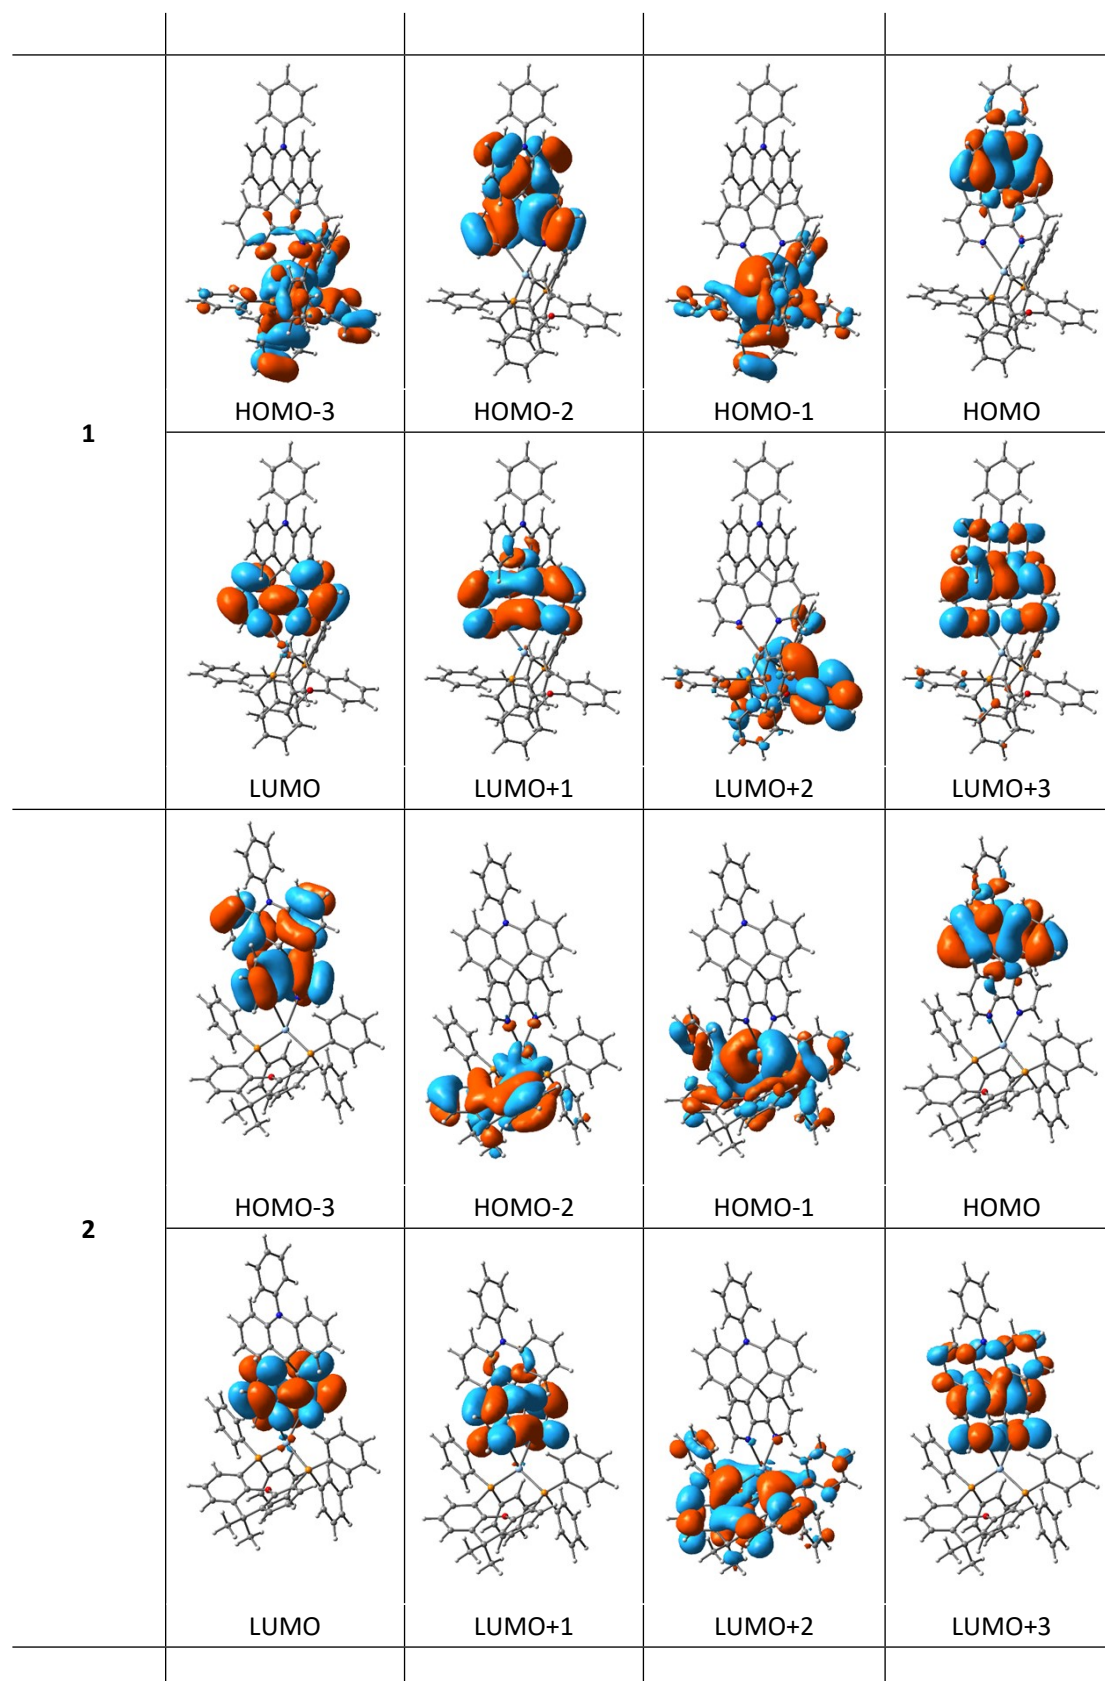

Fig. S8. The electronic density contour of complex 1 and 2.

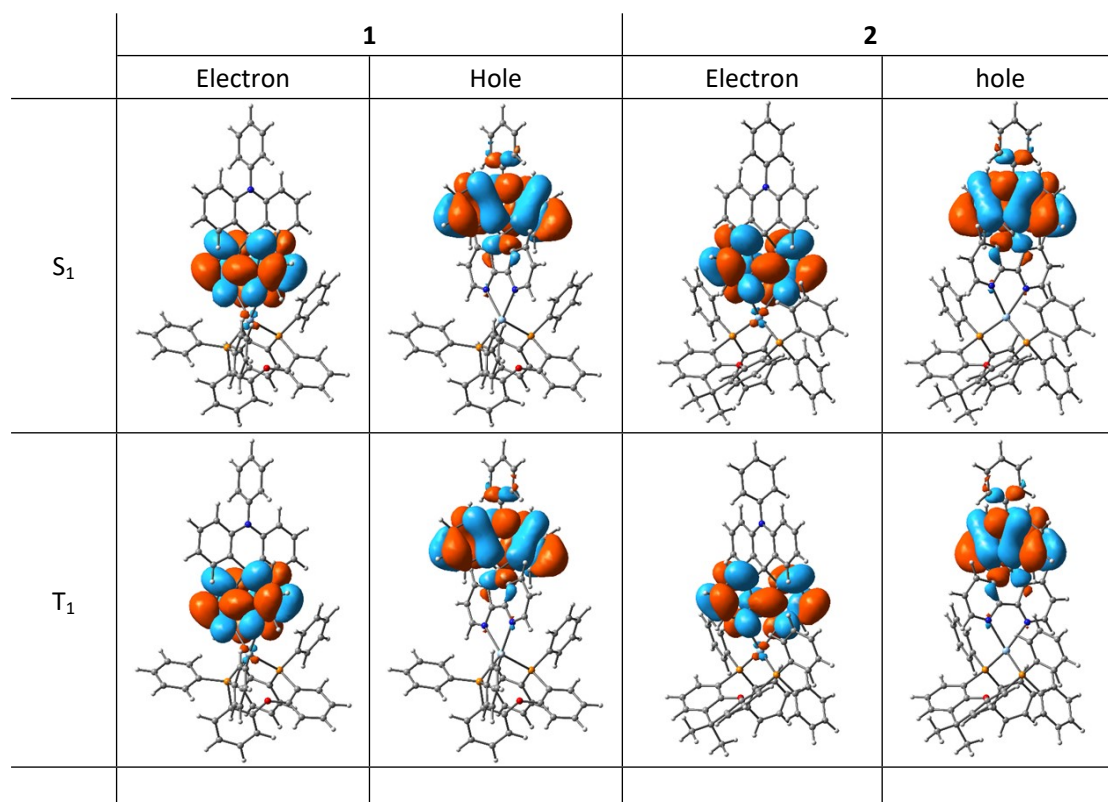

Fig. S9. The electronic density contour of isolated and coupled on optimized  $S_1$  and  $T_1$  structure.

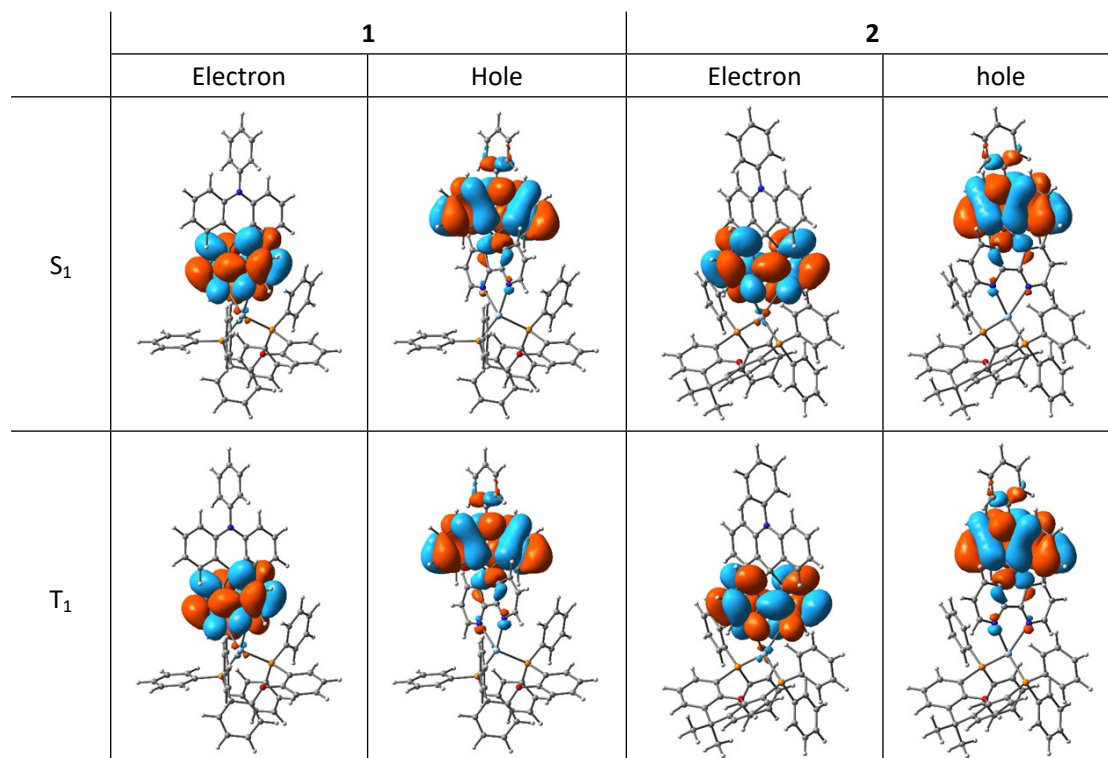

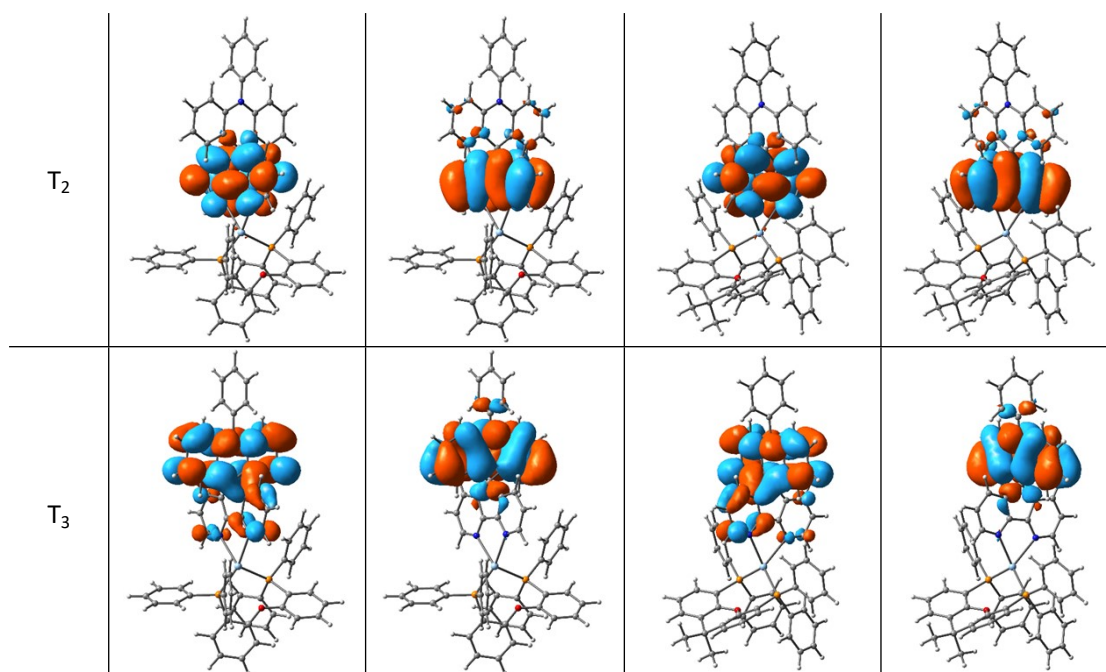

Fig. S10. The electronic density contour of isolated and coupled on optimized  $S_0$  structure.

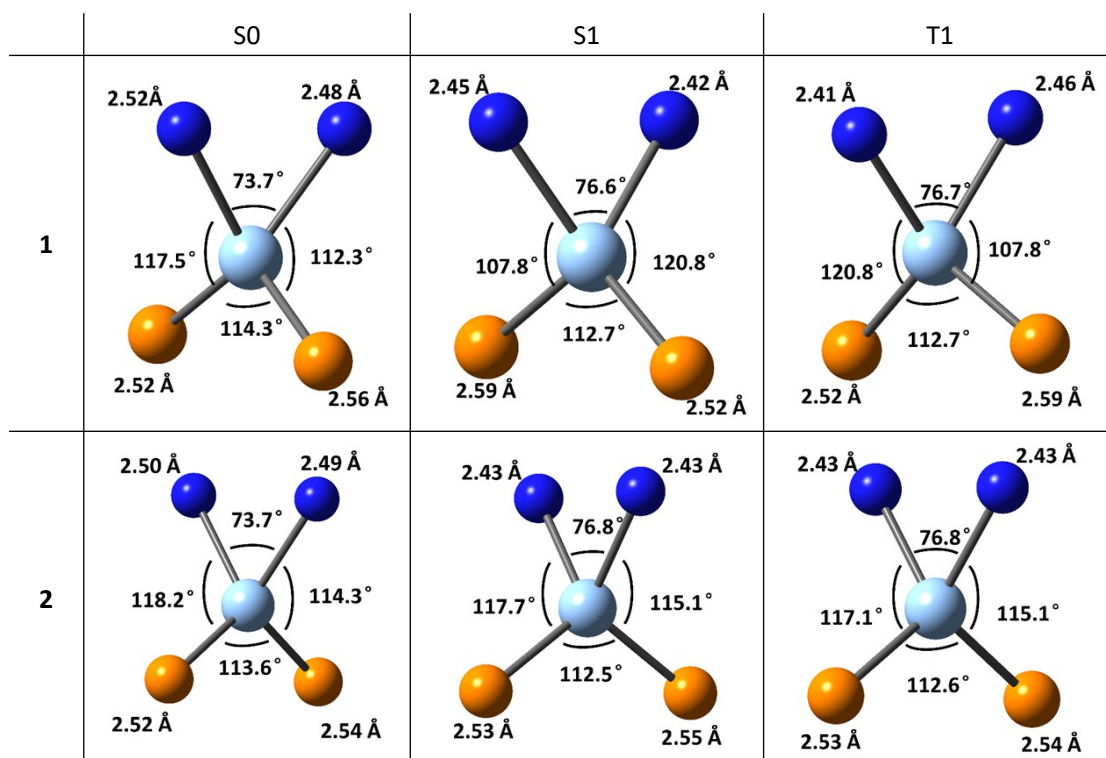

Fig. S11. Coordination geometries structures of **1** and **2** in  $S_0$ ,  $S_1$ , and  $T_1$  states optimized with DFT and TD-DFT.

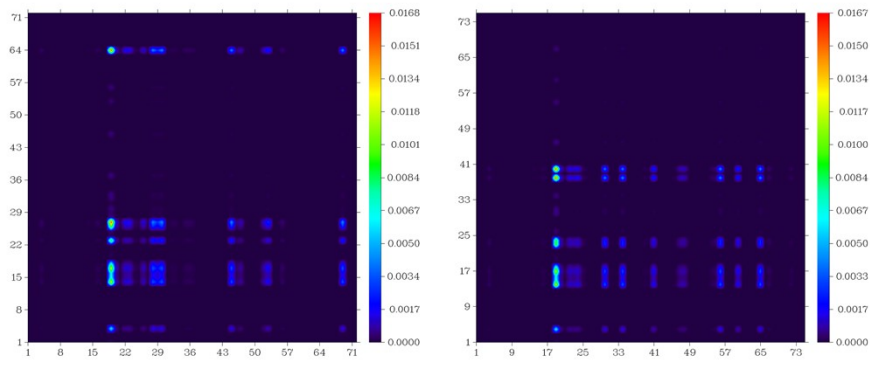

Fig. S12 The transition density matrix of complex **1** (left) and **2** (right).

## 8. Photophysical Properties

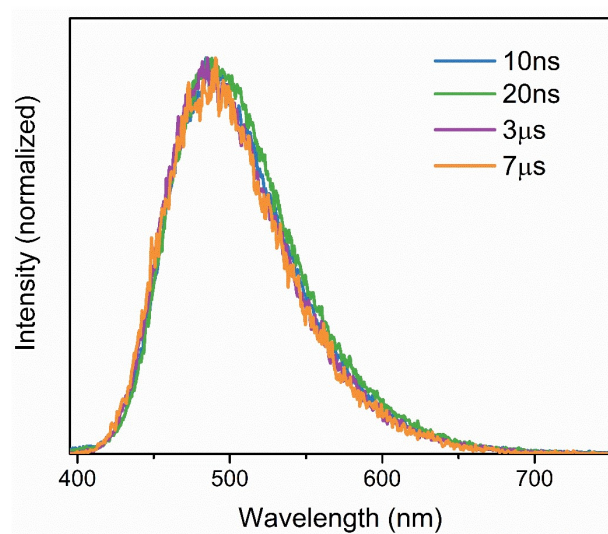

Fig. S13. Time-resolved PL spectra of **1** in 10wt%-doped PMMA film at 298K.

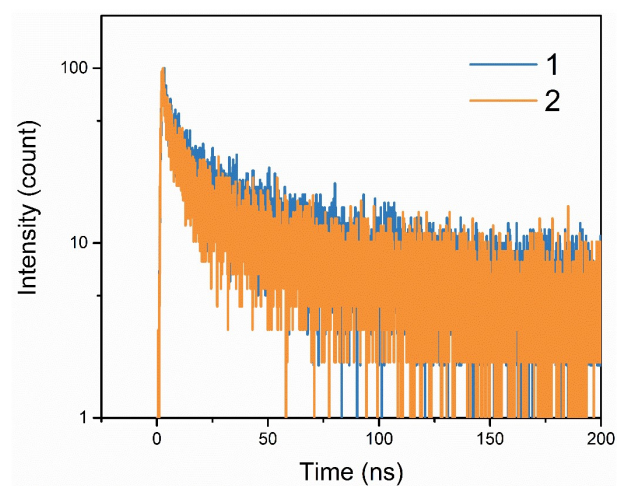

Fig. S14. Transient PL decay spectrum of **1** and **2** doped into PMMA films (10 wt%) at 298K.



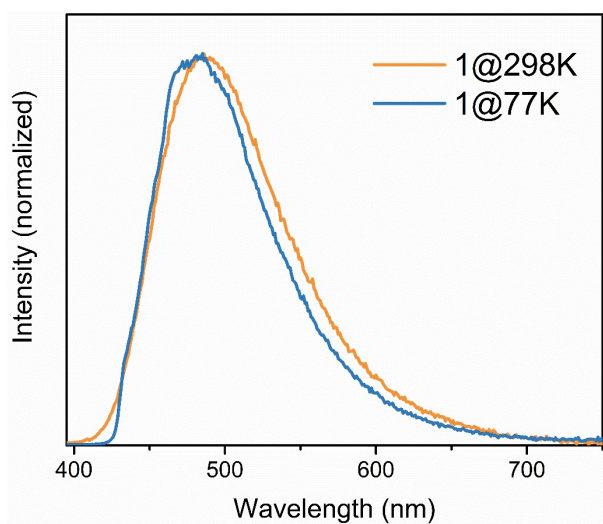

Fig. S15. PL spectra of complexes **1** doped in PMMA film (10 wt%) at 298K and 77K.

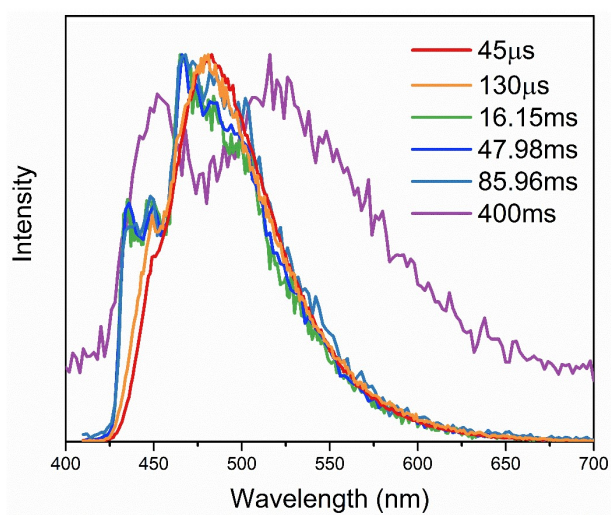

Fig. S16. Time-resolved PL spectra of **1** in 10wt%-doped PMMA film at 77K.

## 9. Equations

According to Fermi's golden rule, the ISC rate can be described as follow <sup>[4]</sup>:

$$k_{ISC} \propto \langle {}^3\Psi | \hat{H}_{SO} | {}^1\Psi \rangle / \exp(\Delta E_{ST}^2) \quad (1)$$

The rate of ISC, RISC, radiative rate constant ( $k_r^S$ ) can be calculated from the experimental data as follow <sup>[5-8]</sup>:

$$k_p = \frac{1}{\tau_p} \quad (2)$$

$$k_d = \frac{1}{\tau_d} \quad (3)$$

$$k_r^S = \Phi_F k_p \quad (4)$$

$$k_{ISC} = \left(1 - \frac{\Phi_F}{\Phi}\right) k_p \quad (5)$$

$$k_{RISC} = \frac{k_p k_d \Phi_{TADF}}{k_{ISC} \Phi_F} \quad (6)$$

Where  $\tau_p$  is the transient decay time of the prompt component,  $\tau_d$  is the transient decay time of the delayed component,  $\Phi_F$  and  $\Phi_{TADF}$  are the prompt and delayed components of the PL quantum efficiency, respectively.

## 10. Reference

- 1 Liang D, Jia J-H, Yang M, et al. *Adv Opt Mater*, 2022: 2201130, doi:10.1002/adom.202201130
- 2 M. J. Frisch, G. W. Trucks, H. B. Schlegel, G. E. Scuseria, M. A. Robb, J. R. Cheeseman, G. Scalmani, V. Barone, B. Mennucci, G. A. Petersson, H. Nakatsuji, M. Caricato, X. Li, H. P. Hratchian, A. F. Izmaylov, J. Bloino, G. Zheng, J. L. Sonnenberg, M. Hada, M. Ehara, K. Toyota, R. Fukuda, J. Hasegawa, M. Ishida, T. Nakajima, Y. Honda, O. Kitao, H. Nakai, T. Vreven, J. A. Montgomery, J. E. P. Jr., F. Ogliaro, M. Bearpark, J. J. Heyd, E. Brothers, K. N. Kudin, V. N. Staroverov, R. Kobayashi, J. Normand, K. Raghavachari, A. Rendell, J. C. Burant, S. S. Iyengar, J. Tomasi, M. Cossi, N. Rega, J. M. Millam, M. Klene, J. E. Knox, J. B. Cross, V. Bakken, C. Adamo, J. Jaramillo, R. Gomperts, R. E. Stratmann, O. Yazyev, A. J. Austin, R. Cammi, C. Pomelli, J. W. Ochterski, R. L. Martin, K. Morokuma, V. G. Zakrzewski, G. A. Voth, P. Salvador, J. J. Dannenberg, S. Dapprich, A. D. Daniels, Ö. Farkas, J. B. Foresman, J. V. Ortiz, J. Cioslowski, D. J. Fox, Gaussian09, Revision D.01; Gaussian Inc.: Wallingford CT, **2016**
- 3 T. Lu, F. Chen, *J Comput Chem* **2012**, *33*, 580-592
- 4 Y. Xiong, Z. Zhao, W. Zhao, H. Ma, Q. Peng, Z. He, et al., *Angew Chem Int Ed*, 2018, *57*: 7997-8001
- 5 L.-S. Cui, A. J. Gillett, S.-F. Zhang, H. Ye, Y. Liu, X.-K. Chen, Z.-S. Lin, E. W. Evans, W. K. Myers, T. K. Ronson, H. Nakanotani, S. Reineke, J.-L. Bredas, C. Adachi and R. H. Friend, Fast spin-flip enables efficient and stable organic electroluminescence from charge-transfer states, *Nat. Photonics*, 2020, **14**, 636-642.
- 6 K. Wang, W. Liu, C.-J. Zheng, Y.-Z. Shi, K. Liang, M. Zhang, X.-M. Ou and X.-H. Zhang, A comparative study of carbazole-based thermally activated delayed fluorescence emitters with different steric hindrance, *J. Mater. Chem. C*, 2017, **5**, 4797-4803.
- 7 D. Chen, X. Cai, X.-L. Li, Z. He, C. Cai, D. Chen and S.-J. Su, Efficient solution-processed red all-fluorescent organic light-emitting diodes employing thermally activated delayed fluorescence materials as assistant hosts: molecular design strategy and exciton dynamic analysis, *J. Mater. Chem. C*, 2017, **5**, 5223-5231.
- 8 Z. Cheng, J. Liang, Z. Li, T. Yang, C. Lin, X. Mu and Y. Wang, Photoluminescent manipulation of phenoxazine-based molecules via regulating conformational isomerization, and the corresponding electroluminescent properties, *J. Mater. Chem. C*, 2019, **7**, 14255-14263.
